# Supplementary material
Source: PubMed Central journal article supplement (PMC1855406)

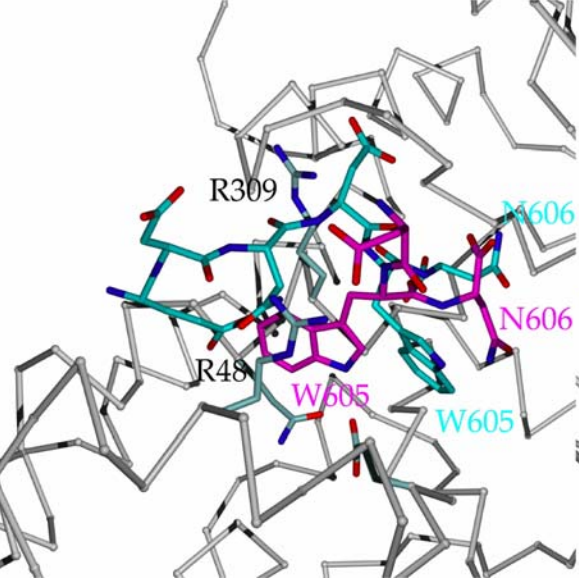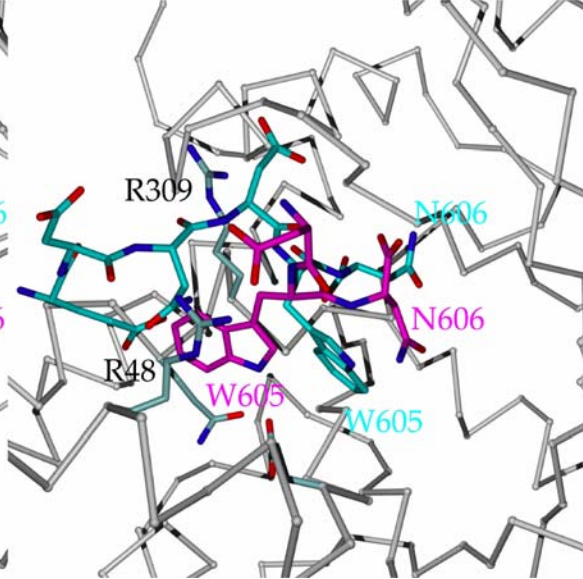

Supplement: pnas_0605301104_1.pdf [file pnas_0605301104_1.pdf]

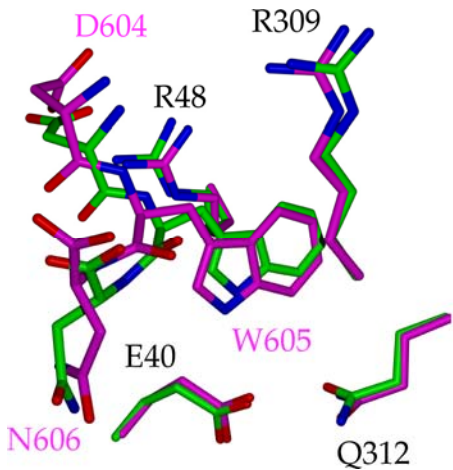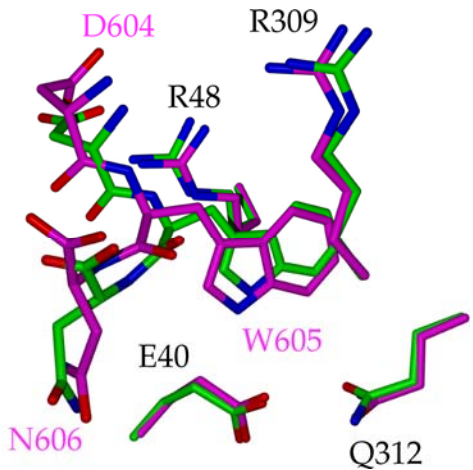

Supplement: pnas_0605301104_2.pdf [file pnas_0605301104_2.pdf]

**A** PfAldo -TRAP complex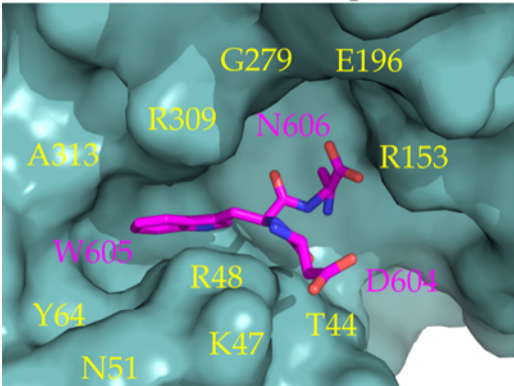**B** PfAldo - unliganded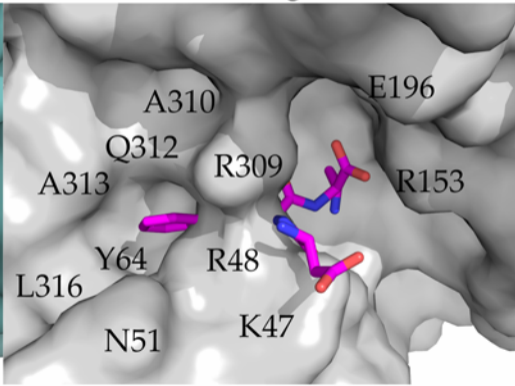

Supplement: pnas_0605301104_3.pdf [file pnas_0605301104_3.pdf]
